# Supplementary material for: Propensity Score-Matched Analysis to Identify Pathways Associated with Loss of Sodium Iodide Symporter in Papillary Thyroid Cancer
Source: MDPI journal article supplement (doi:10.3390/cimb44040101), 2022-03-26
Supplement: s1 [file s1]

**Supplementary Table S1** Clinicopathologic features of the TCGA-THCA patient cohort grouped by the expression of sodium-iodide symporter (NIS) after propensity score matching

|                                         | NIS low<br>(n = 121) | NIS high<br>(n = 121) | <i>p</i> value |
|-----------------------------------------|----------------------|-----------------------|----------------|
| Age (years)                             | 47 (35-58)           | 46 (35-56)            | 0.934          |
| Female                                  | 87 (72%)             | 87 (72%)              | 1.000          |
| Subtype                                 |                      |                       | 0.884          |
| Classic                                 | 79 (65%)             | 82 (68%)              |                |
| Follicular variant                      | 33 (27%)             | 29 (24%)              |                |
| Tall cell variant                       | 8 (7%)               | 8 (7%)                |                |
| Other variants                          | 1 (1%)               | 2 (2%)                |                |
| Tumor size (cm)                         | 2.5 (1.7-3.2)        | 2.1 (1.5-3.4)         | 0.348          |
| Multifocality <sup>a</sup>              | 52 (44%)             | 52 (44%)              | 0.908          |
| Extrathyroidal extension <sup>a,b</sup> |                      |                       | 0.946          |
| None                                    | 92 (79%)             | 94 (79%)              |                |
| Minimal (T3)                            | 24 (21%)             | 24 (20%)              |                |
| Advanced (T4)                           | 1 (1%)               | 1 (1%)                |                |
| Lymph node metastasis                   | 37 (31%)             | 38 (31%)              | 0.889          |
| Stage <sup>b</sup>                      |                      |                       | 0.274          |
| Stage I                                 | 68 (56%)             | 76 (63%)              |                |
| Stage II                                | 18 (15%)             | 16 (13%)              |                |
| Stage III                               | 25 (21%)             | 22 (18%)              |                |
| Stage IV                                | 10 (8%)              | 7 (6%)                |                |
| Risk of recurrence <sup>a,b</sup>       |                      |                       | 0.895          |
| Low                                     | 58 (51%)             | 58 (52%)              |                |
| Intermediate                            | 54 (48%)             | 54 (48%)              |                |
| High                                    | 1 (1%)               | 0 (0%)                |                |
| <i>BRAF</i> V600E mutation              | 72 (60%)             | 72 (60%)              | 1.000          |
| <i>RAS</i> mutation                     | 17 (14%)             | 14 (12%)              | 0.564          |
| <i>TERT</i> promoter mutation           | 8 (7%)               | 8 (7%)                | 1.000          |

<sup>a</sup> Missing data excluded. <sup>b</sup> Cochran-Armitage trend test.

Data are expressed as the number (percentage) or median (interquartile range).
